# Supplementary material for: Effect of Salts on the Conformational Dynamics of the Cytochrome P450 OleP
Source: MDPI journal article supplement (doi:10.3390/molecules28020832), 2023-01-13
Supplement: s1 [file s1]

Article

# Effect of Salts on the Conformational Dynamics of the Cytochrome P450 OleP

Maria Laura De Sciscio <sup>1,†</sup> , Alessandro Nicola Nardi <sup>1,†</sup> , Giacomo Parisi <sup>2</sup> , Giovanni Bulfaro <sup>3,4</sup> , Antonella Costanzo <sup>3,4,5</sup> , Elena Gugole <sup>3</sup> , Cécile Exertier <sup>5</sup> , Ida Freda <sup>3</sup> , Carmelinda Savino <sup>5</sup> , Beatrice Vallone <sup>3,\*</sup> , Linda Celeste Montemiglio <sup>5,\*</sup>  and Marco D'Abramo <sup>1,\*</sup> 

<sup>1</sup> Department of Chemistry, University of Rome, Sapienza, P.le A. Moro 5, 00185 Rome, Italy

<sup>2</sup> Center for Life Nano & Neuro-Science, Fondazione Istituto Italiano di Tecnologia, IIT, 00185 Rome, Italy

<sup>3</sup> Department of Biochemical Sciences "A. Rossi Fanelli", University of Rome, Sapienza, P.le A. Moro 5, 00185 Rome, Italy

<sup>4</sup> Takis Biotech, Via di Castel Romano 100, 00128 Rome, Italy

<sup>5</sup> Institute of Molecular Biology and Pathology, CNR c/o Department of Biochemical Sciences "A. Rossi Fanelli", University of Rome, Sapienza, P.le A. Moro 5, 00185 Rome, Italy

\* Correspondence: beatrice.vallone@uniroma1.it (B.V.); lindaceleste.montemiglio@cnr.it (L.C.M.); marco.dabramo@uniroma1.it (M.D.)

† These authors contributed equally to this work.

## 1. 6DEB Force Field Parameters

The following parameters for the 6-deoxyerythronolide B (6DEB) molecule were obtained by using CGenFF [1] in a form which is compatible with the CHARMM36 force field [2]. The obtained parameters were not further optimized.

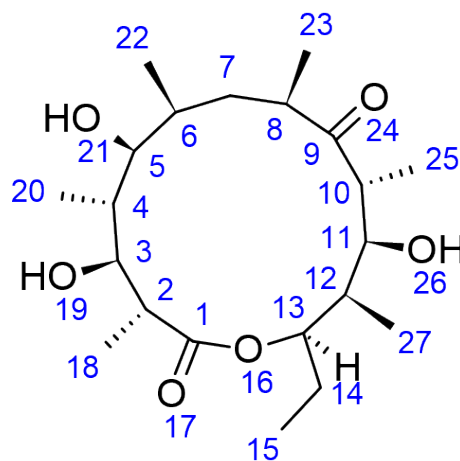

**Figure S1.** Indices of 6DEB nonhydrogen atoms.

In the following table, we report the list of the atom types used.

In Table S1 all the hydrogen atoms and their atom types are reported explicitly, but in Figure S1, for sake of clarity, the hydrogen atoms were not indicated. However, for methylic, methylenic and methynic hydrogen atoms the HGA3, HGA2, and HGA1 atom types were used, respectively. For the hydroxilic hydrogen atoms the HGP1 atom type was used.

In the following tables, we report the list of the additional bond parameters used, in addition to the ones already present in CHARMM36 force field.

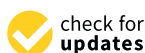

**Citation:** De Sciscio, M.L.; Nardi, A.N.; Parisi, G.; Bulfaro, G.; Costanzo, A.; Gugole, E.; Exertier, C.; Freda, I.; Savino, C.; Vallone, B.; et al. Effect of Salts on the Conformational Dynamics of the Cytochrome P450 OleP. *Molecules* **2023**, *1*, 0.

<https://doi.org/>

Received: 13 December 2022

Revised: 10 January 2023

Accepted: 10 January 2023

Published: 13 January 2023

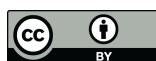

**Copyright:** © 2023 by the authors. Licensee MDPI, Basel, Switzerland. This article is an open access article distributed under the terms and conditions of the Creative Commons Attribution (CC BY) license (<https://creativecommons.org/licenses/by/4.0/>).

**Table S1.** Atom types, masses and atomic charges used for the parameterization of 6DEB. The atom indices refer to the Figure S1.

| Index | Atom Name | Atom Type | Mass (Da) | Charge (e) | $\sigma$ (nm)  | $\epsilon$ (kJ/mol) |
|-------|-----------|-----------|-----------|------------|----------------|---------------------|
| 1     | C1        | CG2O2     | 12.011    | 0.887      | 0.302905564168 | 0.41003             |
| 2     | C2        | CG311     | 12.011    | −0.117     | 0.356359487256 | 0.13389             |
| 3     | C3        | CG311     | 12.011    | 0.130      | 0.356359487256 | 0.13389             |
| 4     | C4        | CG311     | 12.011    | −0.082     | 0.356359487256 | 0.13389             |
| 5     | C5        | CG311     | 12.011    | 0.138      | 0.356359487256 | 0.13389             |
| 6     | C6        | CG311     | 12.011    | −0.076     | 0.356359487256 | 0.13389             |
| 7     | C7        | CG321     | 12.011    | −0.180     | 0.358141284692 | 0.23430             |
| 8     | C8        | CG311     | 12.011    | −0.002     | 0.356359487256 | 0.13389             |
| 9     | C9        | CG2O5     | 12.011    | 0.283      | 0.356359487256 | 0.37656             |
| 10    | C10       | CG311     | 12.011    | 0.005      | 0.356359487256 | 0.13389             |
| 11    | C11       | CG311     | 12.011    | 0.145      | 0.356359487256 | 0.13389             |
| 12    | C12       | CG311     | 12.011    | −0.089     | 0.356359487256 | 0.13389             |
| 13    | C13       | CG311     | 12.011    | 0.176      | 0.356359487256 | 0.13389             |
| 14    | C14       | CG321     | 12.011    | −0.193     | 0.358141284692 | 0.23430             |
| 15    | C15       | CG331     | 12.011    | −0.258     | 0.365268474438 | 0.32635             |
| 17    | O17       | OG2D1     | 15.999    | −0.634     | 0.302905564168 | 0.50208             |
| 18    | C18       | CG331     | 12.011    | −0.270     | 0.365268474438 | 0.32635             |
| 20    | C20       | CG331     | 12.011    | −0.269     | 0.365268474438 | 0.32635             |
| 22    | C22       | CG331     | 12.011    | −0.271     | 0.365268474438 | 0.32635             |
| 23    | C23       | CG331     | 12.011    | −0.261     | 0.365268474438 | 0.32635             |
| 24    | O24       | OG2D3     | 15.999    | −0.501     | 0.302905564168 | 0.20920             |
| 25    | C25       | CG331     | 12.011    | −0.259     | 0.365268474438 | 0.32635             |
| 27    | C27       | CG331     | 12.011    | −0.269     | 0.365268474438 | 0.32635             |
| 28    | H1        | HGA1      | 1.008     | 0.090      | 0.238760856462 | 0.18828             |
| 29    | H2        | HGA1      | 1.008     | 0.090      | 0.238760856462 | 0.18828             |
| 30    | H3        | HGA1      | 1.008     | 0.090      | 0.238760856462 | 0.18828             |
| 31    | H4        | HGA1      | 1.008     | 0.090      | 0.238760856462 | 0.18828             |
| 32    | H5        | HGA1      | 1.008     | 0.090      | 0.238760856462 | 0.18828             |
| 33    | H6        | HGA2      | 1.008     | 0.090      | 0.238760856462 | 0.14644             |
| 34    | H7        | HGA2      | 1.008     | 0.090      | 0.238760856462 | 0.14644             |
| 35    | H8        | HGA1      | 1.008     | 0.090      | 0.238760856462 | 0.18828             |
| 36    | H9        | HGA1      | 1.008     | 0.090      | 0.238760856462 | 0.18828             |
| 37    | H10       | HGA1      | 1.008     | 0.090      | 0.238760856462 | 0.18828             |
| 38    | H11       | HGA1      | 1.008     | 0.090      | 0.238760856462 | 0.18828             |
| 39    | H12       | HGA1      | 1.008     | 0.090      | 0.238760856462 | 0.18828             |
| 40    | H13       | HGA2      | 1.008     | 0.090      | 0.238760856462 | 0.14644             |
| 41    | H14       | HGA2      | 1.008     | 0.090      | 0.238760856462 | 0.14644             |
| 42    | H15       | HGA3      | 1.008     | 0.090      | 0.238760856462 | 0.10042             |
| 43    | H16       | HGA3      | 1.008     | 0.090      | 0.238760856462 | 0.10042             |
| 44    | H17       | HGA3      | 1.008     | 0.090      | 0.238760856462 | 0.10042             |
| 45    | H18       | HGA3      | 1.008     | 0.090      | 0.238760856462 | 0.10042             |
| 46    | H19       | HGA3      | 1.008     | 0.090      | 0.238760856462 | 0.10042             |
| 47    | H20       | HGA3      | 1.008     | 0.090      | 0.238760856462 | 0.10042             |
| 48    | H21       | HGP1      | 1.008     | 0.419      | 0.040001352445 | 0.19246             |
| 49    | H22       | HGA3      | 1.008     | 0.090      | 0.238760856462 | 0.10042             |
| 50    | H23       | HGA3      | 1.008     | 0.090      | 0.238760856462 | 0.10042             |
| 51    | H24       | HGA3      | 1.008     | 0.090      | 0.238760856462 | 0.10042             |
| 52    | H25       | HGP1      | 1.008     | 0.419      | 0.040001352445 | 0.19246             |
| 53    | H26       | HGA3      | 1.008     | 0.090      | 0.238760856462 | 0.10042             |
| 54    | H27       | HGA3      | 1.008     | 0.090      | 0.238760856462 | 0.10042             |
| 55    | H28       | HGA3      | 1.008     | 0.090      | 0.238760856462 | 0.10042             |
| 56    | H29       | HGA3      | 1.008     | 0.090      | 0.238760856462 | 0.10042             |
| 57    | H30       | HGA3      | 1.008     | 0.090      | 0.238760856462 | 0.10042             |
| 58    | H31       | HGA3      | 1.008     | 0.090      | 0.238760856462 | 0.10042             |
| 59    | H32       | HGA3      | 1.008     | 0.090      | 0.238760856462 | 0.10042             |
| 60    | H33       | HGA3      | 1.008     | 0.090      | 0.238760856462 | 0.10042             |
| 61    | H34       | HGA3      | 1.008     | 0.090      | 0.238760856462 | 0.10042             |
| 62    | H35       | HGP1      | 1.008     | 0.419      | 0.040001352445 | 0.19246             |
| 63    | H36       | HGA3      | 1.008     | 0.090      | 0.238760856462 | 0.10042             |
| 64    | H37       | HGA3      | 1.008     | 0.090      | 0.238760856462 | 0.10042             |
| 65    | H38       | HGA3      | 1.008     | 0.090      | 0.238760856462 | 0.10042             |

**Table S2.** Angle bend parameters.

| Atom Type | Atom Type | Atom Type | $\theta_0$ (deg.) | $k_\theta$ (kJ/mol) |
|-----------|-----------|-----------|-------------------|---------------------|
| CG311     | CG2O5     | CG311     | 115.600000        | 292.880000          |
| CG2O5     | CG311     | CG311     | 108.000000        | 435.136000          |
| CG2O5     | CG311     | CG321     | 108.000000        | 435.136000          |
| CG2O5     | CG311     | CG331     | 108.000000        | 435.136000          |
| CG311     | CG311     | OG302     | 109.700000        | 962.320000          |

**Table S3.** Proper dihedral angle parameters.

| Atom Type | Atom Type | Atom Type | Atom Type | $\phi_0$ (deg.) | $k_\phi$ (kJ/mol) | mult. |
|-----------|-----------|-----------|-----------|-----------------|-------------------|-------|
| CG311     | CG2O2     | OG302     | CG311     | 180.000000      | 8.577200          | 2     |
| CG311     | CG2O5     | CG311     | CG311     | 0.000000        | 3.138000          | 1     |
| CG311     | CG2O5     | CG311     | CG311     | 180.000000      | 0.753120          | 2     |
| CG311     | CG2O5     | CG311     | CG311     | 0.000000        | 0.271960          | 3     |
| CG311     | CG2O5     | CG311     | CG311     | 0.000000        | 0.125520          | 6     |
| CG311     | CG2O5     | CG311     | CG321     | 0.000000        | 3.138000          | 1     |
| CG311     | CG2O5     | CG311     | CG321     | 180.000000      | 0.753120          | 2     |
| CG311     | CG2O5     | CG311     | CG321     | 0.000000        | 0.271960          | 3     |
| CG311     | CG2O5     | CG311     | CG321     | 0.000000        | 0.125520          | 6     |
| CG311     | CG2O5     | CG311     | CG331     | 0.000000        | 3.138000          | 1     |
| CG311     | CG2O5     | CG311     | CG331     | 180.000000      | 0.753120          | 2     |
| CG311     | CG2O5     | CG311     | CG331     | 0.000000        | 0.271960          | 3     |
| CG311     | CG2O5     | CG311     | CG331     | 0.000000        | 0.125520          | 6     |
| CG311     | CG2O5     | CG311     | HGA1      | 0.000000        | 0.418400          | 3     |
| OG2D3     | CG2O5     | CG311     | CG311     | 180.000000      | 3.138000          | 1     |
| OG2D3     | CG2O5     | CG311     | CG311     | 180.000000      | 0.753120          | 2     |
| OG2D3     | CG2O5     | CG311     | CG311     | 180.000000      | 0.271960          | 3     |
| OG2D3     | CG2O5     | CG311     | CG311     | 0.000000        | 0.125520          | 6     |
| OG2D3     | CG2O5     | CG311     | CG321     | 180.000000      | 3.138000          | 1     |
| OG2D3     | CG2O5     | CG311     | CG321     | 180.000000      | 0.753120          | 2     |
| OG2D3     | CG2O5     | CG311     | CG321     | 180.000000      | 0.271960          | 3     |
| OG2D3     | CG2O5     | CG311     | CG321     | 0.000000        | 0.125520          | 6     |
| OG2D3     | CG2O5     | CG311     | CG331     | 180.000000      | 3.138000          | 1     |
| OG2D3     | CG2O5     | CG311     | CG331     | 180.000000      | 0.753120          | 2     |
| OG2D3     | CG2O5     | CG311     | CG331     | 180.000000      | 0.271960          | 3     |
| OG2D3     | CG2O5     | CG311     | CG331     | 0.000000        | 0.125520          | 6     |
| CG2O2     | CG311     | CG311     | CG311     | 0.000000        | 0.836800          | 3     |
| CG2O5     | CG311     | CG311     | CG311     | 0.000000        | 0.836800          | 3     |
| CG2O5     | CG311     | CG311     | OG311     | 0.000000        | 0.836800          | 3     |
| CG2O5     | CG311     | CG311     | HGA1      | 0.000000        | 0.836800          | 3     |
| CG311     | CG311     | CG311     | CG311     | 180.000000      | 2.092000          | 4     |
| CG311     | CG311     | CG311     | OG302     | 180.000000      | 0.836800          | 3     |
| CG321     | CG311     | CG311     | CG331     | 180.000000      | 2.092000          | 4     |
| CG331     | CG311     | CG311     | OG302     | 0.000000        | 0.836800          | 3     |
| OG302     | CG311     | CG311     | HGA1      | 0.000000        | 0.815880          | 3     |
| CG2O5     | CG311     | CG321     | CG311     | 0.000000        | 0.836800          | 3     |
| CG2O5     | CG311     | CG321     | HGA2      | 0.000000        | 0.836800          | 3     |
| OG302     | CG311     | CG321     | CG331     | 180.000000      | 0.669440          | 1     |
| OG302     | CG311     | CG321     | CG331     | 0.000000        | 1.631760          | 2     |
| CG2O5     | CG311     | CG331     | HGA3      | 0.000000        | 0.836800          | 3     |
| CG311     | CG311     | OG302     | CG2O2     | 180.000000      | 2.928800          | 1     |

**Table S4.** Improper dihedrals parameters.

| Atom Type | Atom Type | Atom Type | Atom Type | $\phi_0$ (deg.) | $k_\phi$ (kJ/mol) |
|-----------|-----------|-----------|-----------|-----------------|-------------------|
| CG2O5     | CG311     | CG311     | OG2D3     | 0.000000        | 585.760000        |

## 2. Equilibration Phase of Molecular Dynamics Simulations

For the equilibration phase, we performed a 50-ps MD simulation, then the mean pressure was calculated along the trajectory. If the pressure is lower/higher than the value of 560 bar, we decrease/increase the size of the box by 0.03 nm. With the new box size, we run a new 50-ps MD simulation, providing as the initial positions the last frame of the previous run. We continue this scheme until the mean value of the pressure along the n-th 50-ps MD simulation reaches  $(560 \pm 30)$  bar. This value of the pressure was determined

in a previous work [3] to correctly reproduce the solvent bulk density and the protein hydration shell. For the present study, twenty 50-ps equilibration simulations, for each system, were run.

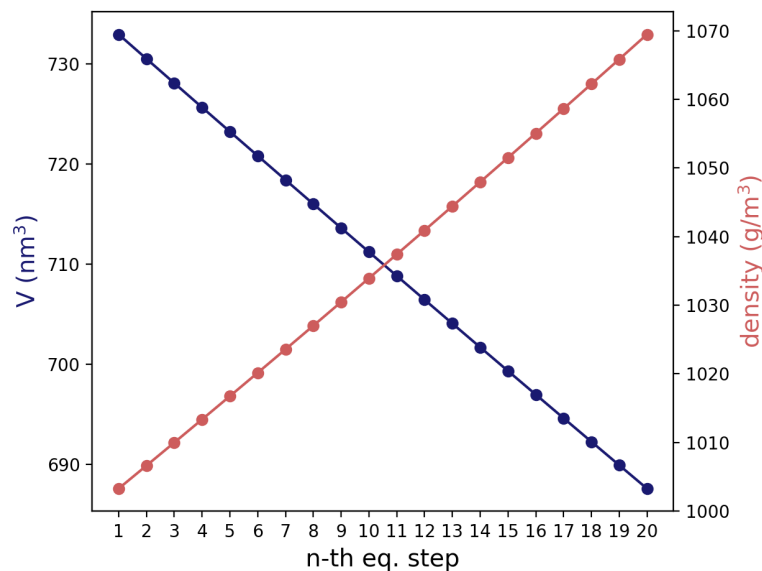

**Figure S2.** Volume and density of the simulated box as a function of the n-th 50 ps short MD equilibration simulation.

### 3. Cation-Dependent Effect on the Spin-State Equilibrium of OleP-6DEB

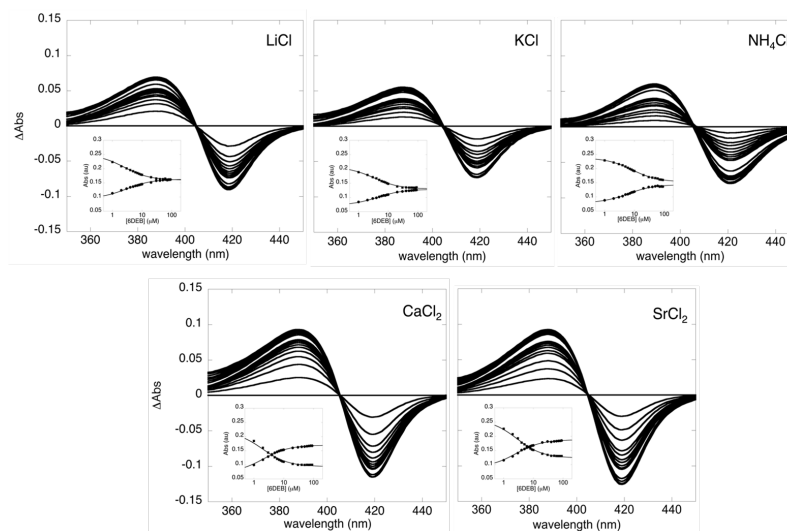

**Figure S3.** Equilibrium titrations of OleP with 6DEB in 50-mM Hepes, pH 7.5, 298 K, in the presence of different mono- and divalent cations at  $I = 0.5$  M. Difference spectral changes observed upon substrate binding are shown. Insets report the absorbance intensities of OleP monitored at 419 nm (full squares) and at 388 nm (full dots) as a function of the logarithm of total 6DEB concentration. Solid lines are the best fit to a hyperbolic function.

#### 4. Intramolecular Electrostatic Interactions Identified in the Open Form of Substrate Bound OleP

**Table S5.** Intramolecular electrostatic interactions identified in the open form of substrate bound OleP.

| Interaction          | Location                                               | Rupture Upon the Open-to-Close Transition |
|----------------------|--------------------------------------------------------|-------------------------------------------|
| R35–E328             | A helix–K'L loop                                       | no                                        |
| R42–E315             | $\beta$ strand $\beta$ 1– $\beta$ hairpins $\beta$ 3   | no                                        |
| R57–D327             | $\beta$ strand $\beta$ 2 – K' helix                    | no                                        |
| R103–E233            | C helix–I helix                                        | yes                                       |
| R105–heme propionate | C helix–heme                                           | no                                        |
| R106–D227–K110       | C helix–HI loop–C helix                                | yes                                       |
| R116–E213            | D helix–GH loop                                        | yes                                       |
| R121–D118–R125–E368  | D helix–D helix–D helix–L helix                        | no                                        |
| R123–E159–R168       | D helix–E helix–EF loop                                | yes                                       |
| R207–D214            | G helix–GH loop                                        | no                                        |
| K231–D201            | I helix–helix G                                        | no                                        |
| R286–E283–R341       | K helix–K helix–K'L loop                               | no                                        |
| R298–heme propionate | $\beta$ hairpins 3–heme                                | no                                        |
| R363–E282            | L helix–K helix                                        | no                                        |
| R375–D129            | L helix–D helix                                        | no                                        |
| R376–D133            | L helix–D helix                                        | no                                        |
| R402–E384            | $\beta$ hairpins $\beta$ 4– $\beta$ hairpins $\beta$ 4 | no                                        |

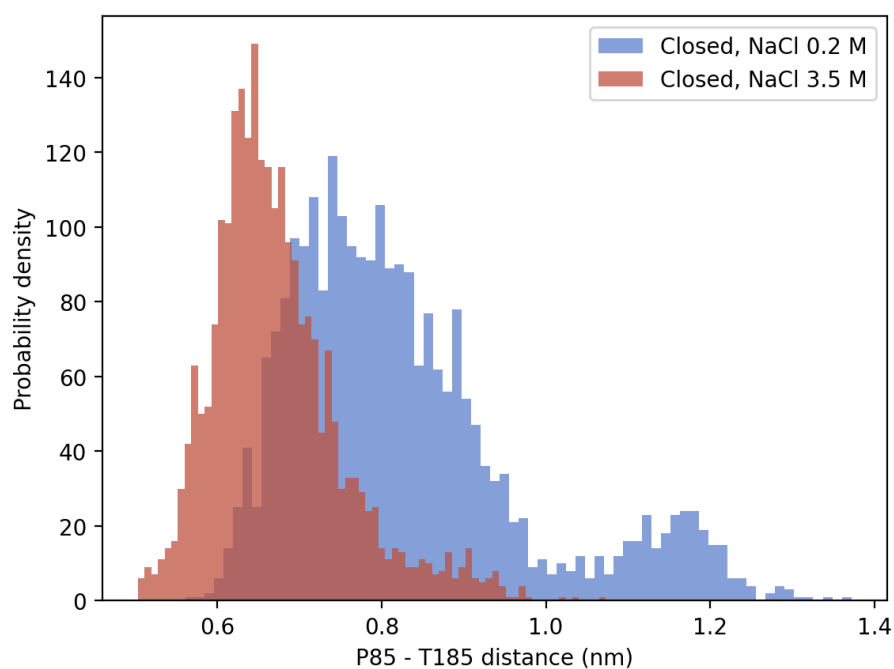

**Figure S4.** P85–T185 distance distribution, descriptor of OleP open-to-close transition, for OleP closed form in high (red) and low (blue) ionic strength in NaCl buffer.

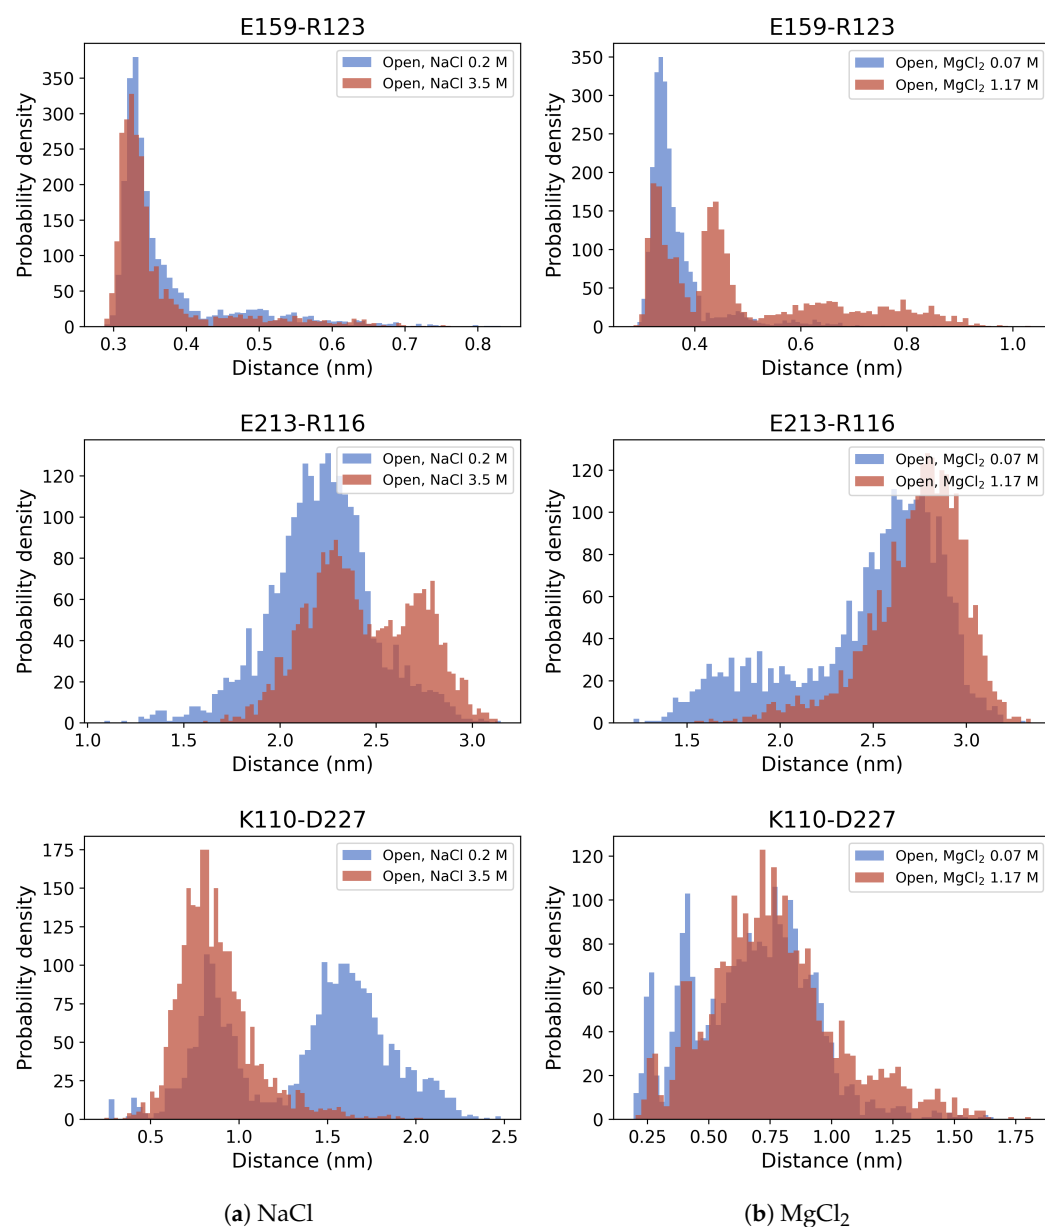

**Figure S5.** Electrostatic interactions between side-chain ion group of E159-R123, E213-R116 and K110-D227 residues in high (red) and low (blue) ionic strength condition in NaCl (a) and MgCl<sub>2</sub> (b) buffer.

## References

1. Soteras Gutiérrez, I.; Lin, F.Y.; Vanommeslaeghe, K.; Lemkul, J.A.; Armacost, K.A.; Brooks, C.L.; MacKerell, A.D. Parametrization of halogen bonds in the CHARMM general force field: Improved treatment of ligand–protein interactions. *Bioorg. Med. Chem.* **2016**, *24*, 4812–4825.
2. Best, R.B.; Zhu, X.; Shim, J.; Lopes, P.E.M.; Mittal, J.; Feig, M.; MacKerell, A.D.J. Optimization of the Additive CHARMM All-Atom Protein Force Field Targeting Improved Sampling of the Backbone  $\varphi$ ,  $\psi$  and Side-Chain  $\chi_1$  and  $\chi_2$  Dihedral Angles. *J. Chem. Theory Comput.* **2012**, *8*, 3257–3273.
3. Del Galdo, S.; Marracino, P.; D’Abramo, M.; Amadei, A. In silico characterization of protein partial molecular volumes and hydration shells. *Phys. Chem. Chem. Phys.* **2015**, *17*, 31270–31277.

**Disclaimer/Publisher’s Note:** The statements, opinions and data contained in all publications are solely those of the individual author(s) and contributor(s) and not of MDPI and/or the editor(s). MDPI and/or the editor(s) disclaim responsibility for any injury to people or property resulting from any ideas, methods, instructions or products referred to in the content.
